# Supplementary material for: Atomic Force Microscopy (AFM) As a Surface Mapping Tool in Microorganisms Resistant Toward Antimicrobials: A Mini-Review
Source: PubMed Central journal article supplement (PMC7567160; doi:10.3389/fphar.2020.517165), 2020-10-02
Supplement: DataSheet_1.pdf [file DataSheet_1.pdf]

## *Supplementary Material*

The WHO Priority Pathogens List for the development of novel antibiotics.

| Organism               | Type                                            | Route of exposure                                              | Antibiotics                                                                   | Resistance | Multi virulent? | Virulence | Priority |
|------------------------|-------------------------------------------------|----------------------------------------------------------------|-------------------------------------------------------------------------------|------------|-----------------|-----------|----------|
| <i>C. difficile</i>    | Bacillus + anaerobic                            | Nosocomial                                                     | Metronidazole, vancomycin                                                     | Low        | Yes             | Virulent  | High     |
| <i>S. aureus</i>       | Coccus + anaerobes                              | Human contact                                                  | Methicillin-resistant, vancomycin intermediate and resistant                  | Medium     | Yes             | Dangerous | High     |
| <i>N. gonorrhoeae</i>  | Diplococci + aerobic                            | Sexually transmitted                                           | 3 <sup>rd</sup> generation cephalosporin-resistant, fluoroquinolone-resistant | Medium     | Yes             | Worrying  | High     |
| <i>M. tuberculosis</i> | Bacillus not classified as aerobic or anaerobic | Air-borne                                                      | Rifampicin, Isoniazid                                                         | Medium     | Yes             | Virulent  | High     |
| <i>A. baumannii</i>    | Coccobacillus + aerobic                         | Medical facilities/ nosocomial fomites                         | Carbapenem-resistant, tigecycline,                                            | High       | Yes             | Worrying  | Critical |
| <i>E. coli</i>         | Bacillus + facultative anaerobe                 | Needle injury/ mucosal exposure of the eye/ aerosol inhalation | Carbapenem-resistant, 3 <sup>rd</sup> generation cephalosporin-resistant      | High       | Yes             | Worrying  | Critical |
| <i>K. pneumoniae</i>   | Bacillus + facultative anaerobe                 | Respiratory tract/ bloodstream                                 | Carbapenem-resistant, 3 <sup>rd</sup> generation cephalosporin-resistant      | Medium     | Yes             | Worrying  | Critical |
| <i>P. aeruginosa</i>   | Bacillus + facultative anaerobe                 | nosocomial                                                     | Carbapenem-resistant                                                          | Medium     | Yes             | Worrying  | Critical |
